# Supplementary material for: Canine CD117-Specific Antibodies with Diverse Binding Properties Isolated from a Phage Display Library Using Cell-Based Biopanning
Source: PubMed Central journal article supplement (PMC6640692; doi:10.3390/antib8010015), 2019-02-12
Supplement: antibodies-08-00015-s001.pdf [file antibodies-08-00015-s001.pdf]

## Supplementary Information

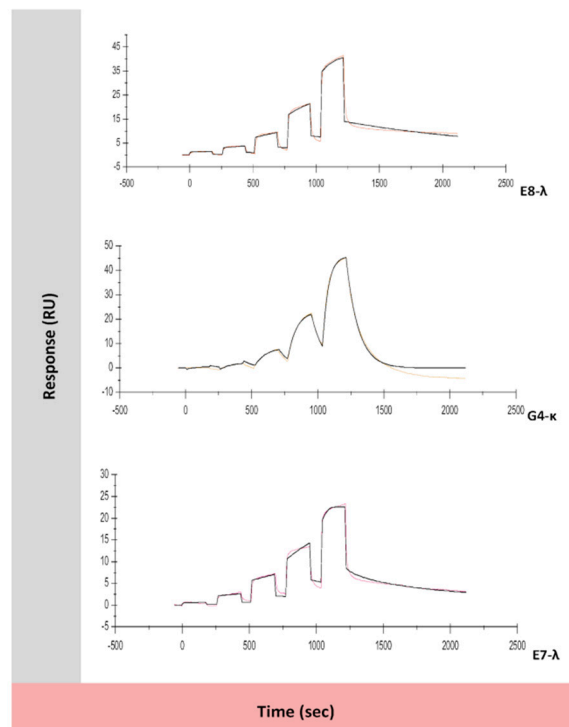

**Figure S1.** Surface plasmon resonance (SPR) sensorgrams for the kinetic interaction between anti-canine CD117 IgG1s (analyte) and the canine CD117-hFc (ligand). The CM5 sensorchip was prepared with high level immobilisation and single-cycle kinetics was performed at a flow rate of 30  $\mu\text{L}/\text{min}$ , allowing a 1:1 binding model to be fit to the data. A 1:1 binding model (Black line) was fitted to the sensorgrams using BiaEvaluation software.
